# Supplementary material for: Molecular insights into the distinct signaling duration for the peptide-induced PTH1R activation
Source: PubMed Central journal article supplement (PMC9586930; doi:10.1038/s41467-022-34009-x), 2022-10-21
Supplement: 41467_2022_34009_MOESM1_ESM.pdf [file 41467_2022_34009_MOESM1_ESM.pdf]

## **Supplementary Information**

### **Molecular insights into the distinct signaling duration for the peptide-induced PTH1R activation**

Zhai et al.

Supplementary Figures 1-14

Supplementary Table 1-7

## Supplementary Fig.1

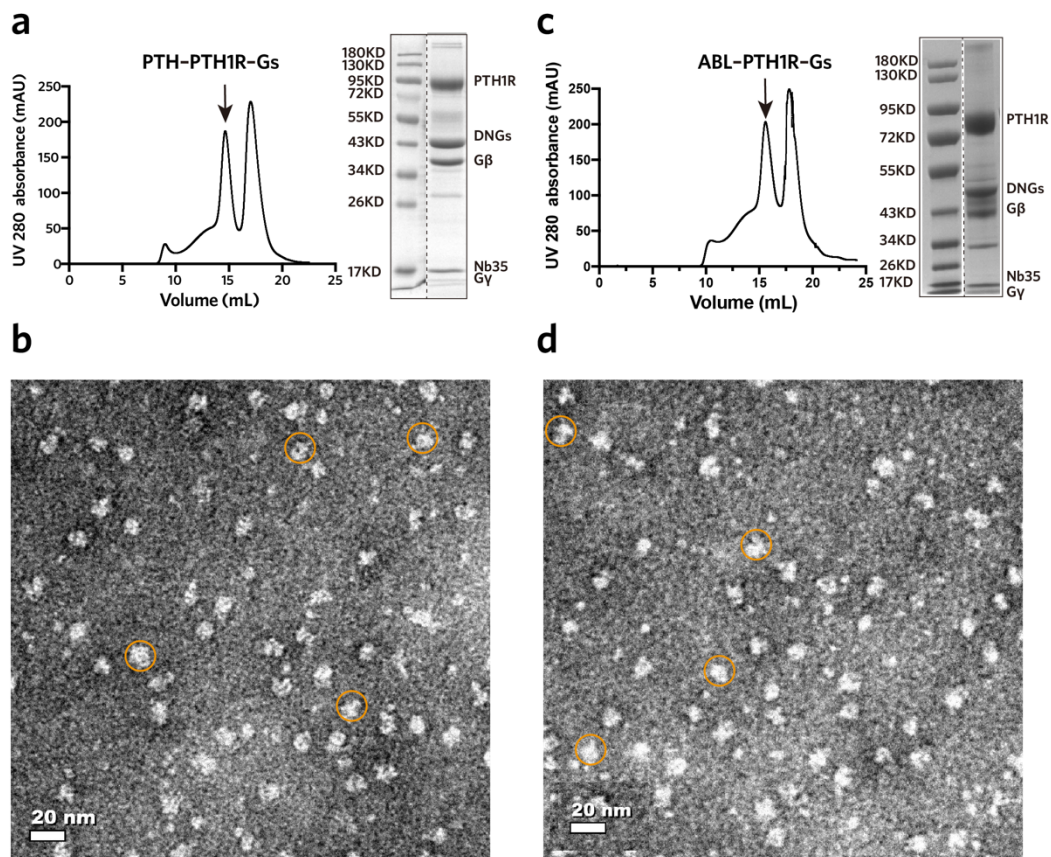

### Supplementary Fig.1 Purification of PTH1R-Gs complexes.

**a-b**, Size exclusion chromatography (SEC) profile, SDS-PAGE and negative-staining EM analysis of the purified PTH-bound PTH1R-Gs complex. **c-d**, SEC profile, SDS-PAGE and negative-staining EM analysis of the purified ABL-bound PTH1R-Gs complex. Examples of the complex are circled in orange. The scale bar is 20 nm. Samples are prepared and repeated over three times. Source data are provided as a Source Data file.

## Supplementary Fig.2

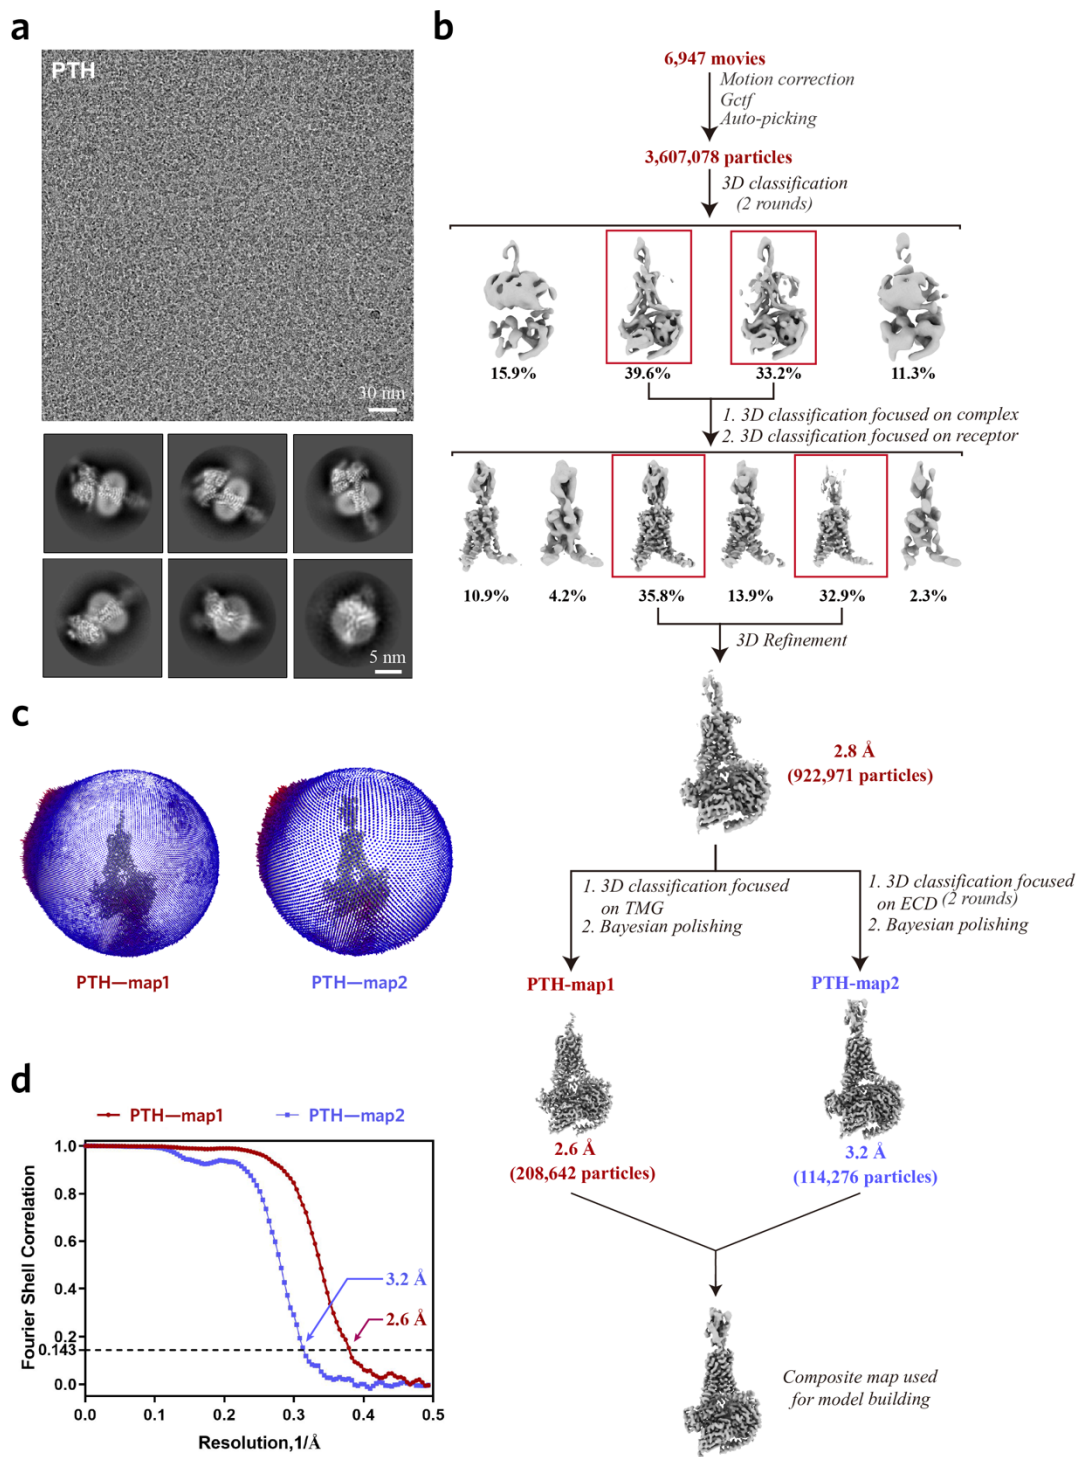

## Supplementary Fig.2 Cryo-EM data processing of PTH-bound PTH1R-Gs complex.

**a**, Cryo-EM micrograph (scale bar: 30 nm) and 2D class averages (scale bar: 5 nm) of PTH-bound PTH1R-Gs complex. **b**, Flow chart of cryo-EM data processing (Details are given in the Method). **c**, Angular distribution of particles used in the final 3D

reconstruction. **d**, Fourier shell correlation (FSC) curves of the final refined map1 and map2.

### Supplementary Fig.3

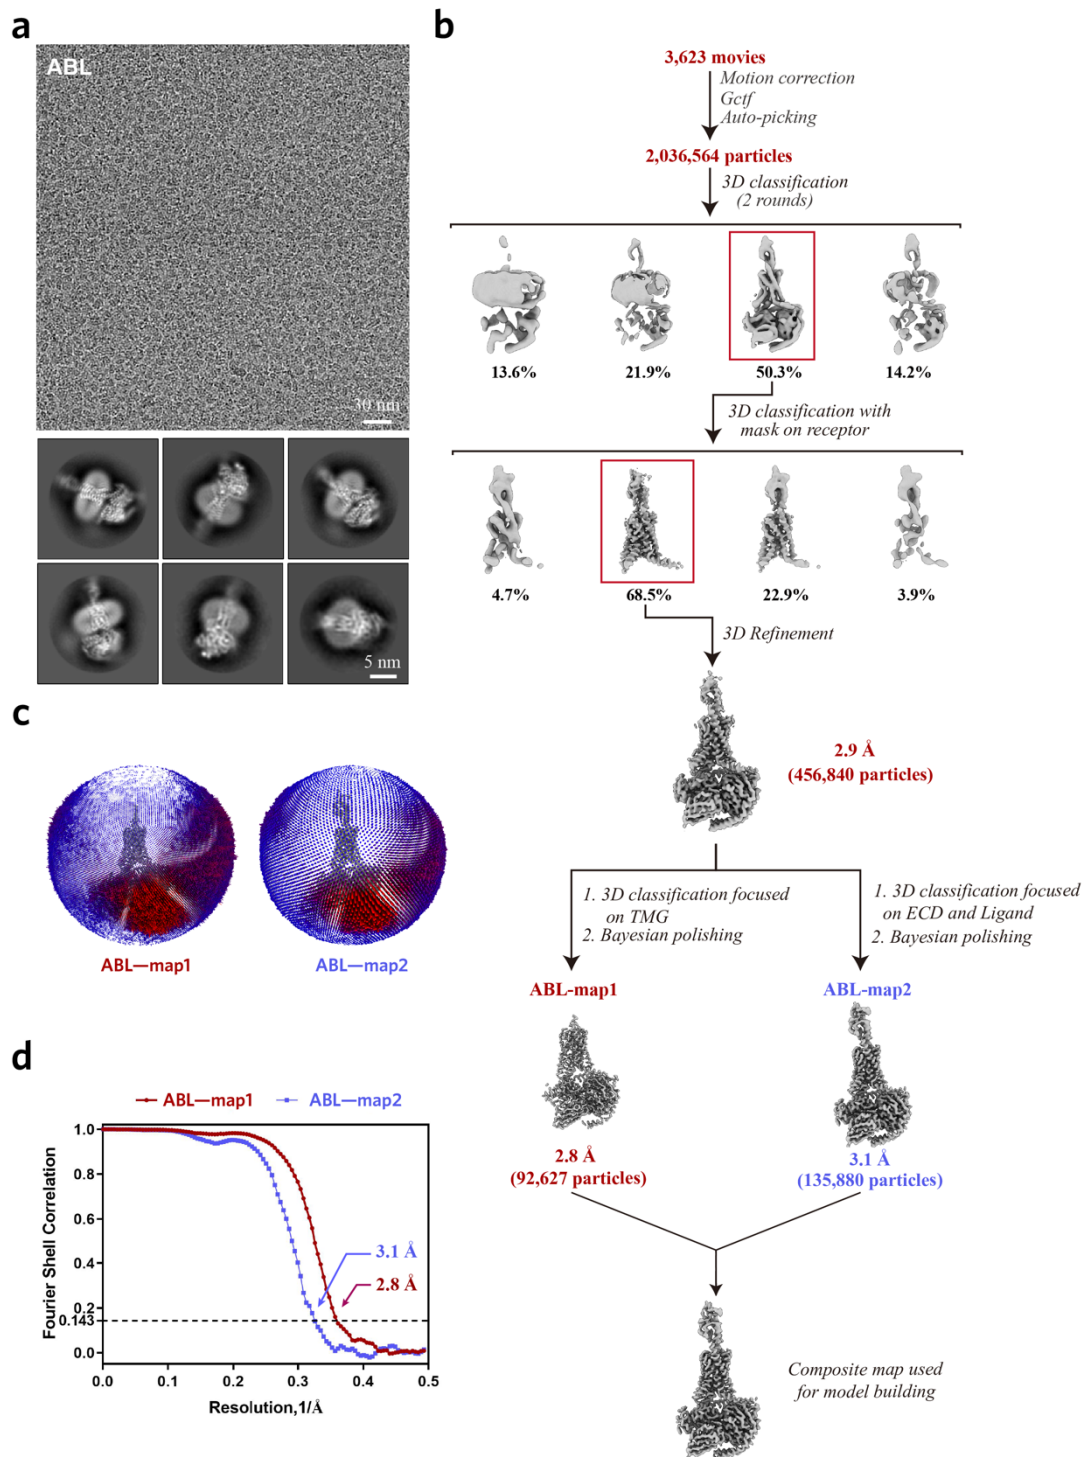

### Supplementary Fig.3 Cryo-EM data processing of ABL-bound PTH1R-Gs complex.

**a**, Cryo-EM micrograph (scale bar: 30 nm) and 2D class averages (scale bar: 5 nm) of ABL-bound PTH1R-Gs complex. **b**, Flow chart of cryo-EM data processing (Details are given in the Method). **c**, Angular distribution of particles used in the final 3D

reconstruction. **d**, Fourier shell correlation (FSC) curves of the final refined map1 and map2.

## Supplementary Fig.4

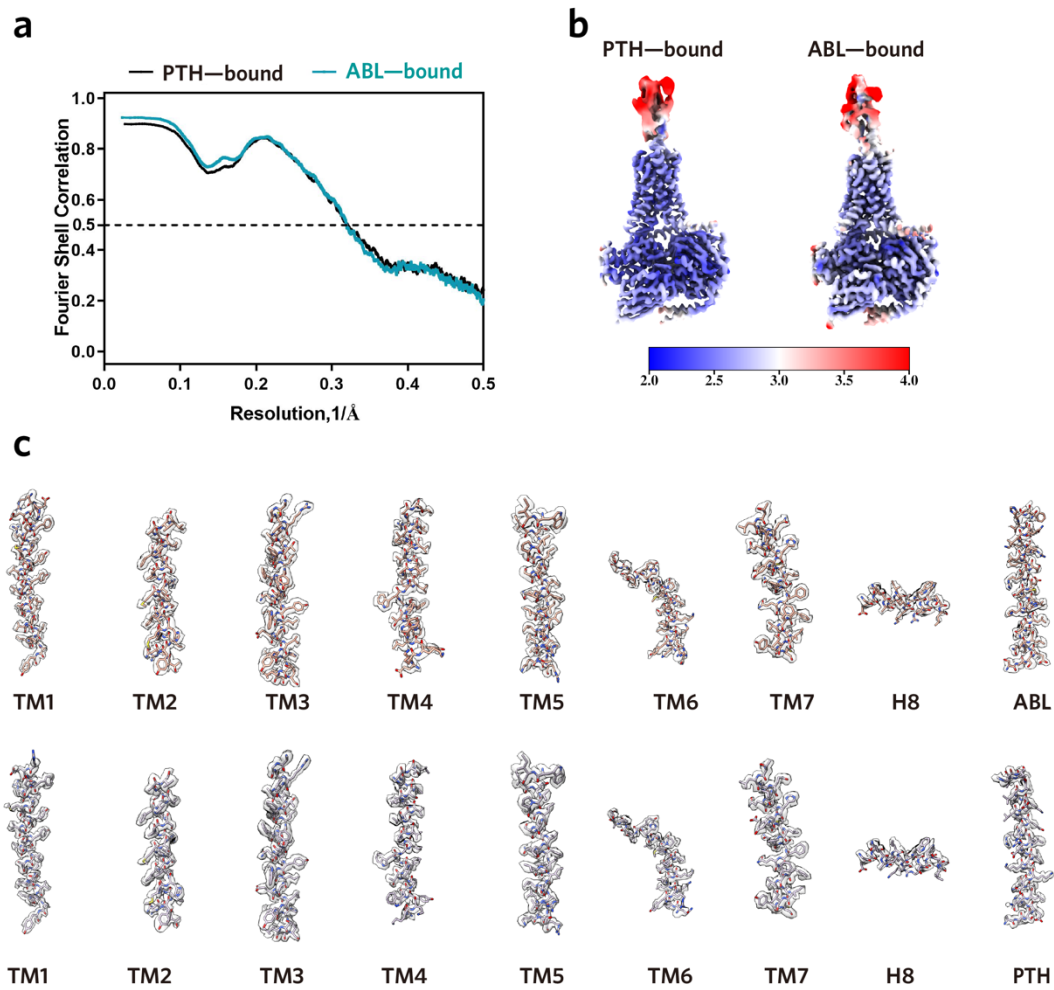

### Supplementary Fig.4 Overall resolution and cryo-EM density analysis of the PTH1R-Gs complexes.

**a**, Fourier shell correlation curves of the model-vs-map. **b**, Cryo-EM maps coloured by local resolution (Å). **c**, Cryo-EM density maps and models are shown for all seven-transmembrane helices, helix 8 and peptide agonists of the PTH1R-Gs complexes.

Supplementary Fig.5

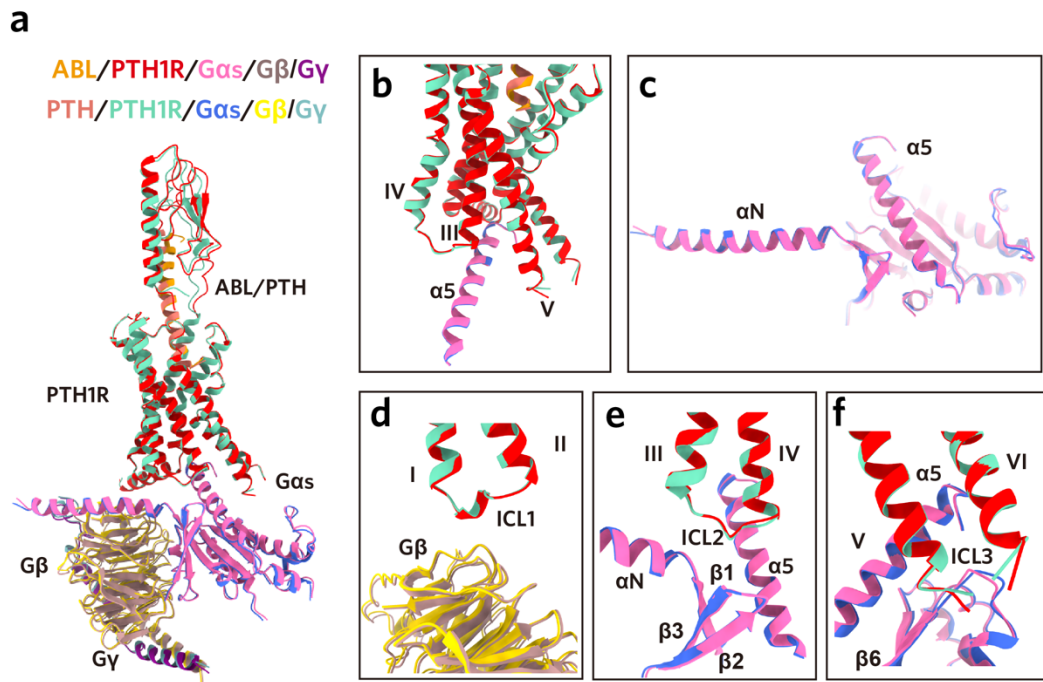

Supplementary Fig.5 Structural comparisons of the ABL and PTH-bound PTH1R-Gs complexes.

**a**, The ABL- and PTH-bound PTH1R-Gs complexes adopt highly similar global conformations. Structures were aligned by the TMD of PTH1R. **b-f**, Conserved interactions between PTH1R and Gs in the ABL- and PTH-bound complexes.



## Supplementary Fig.6

**a**

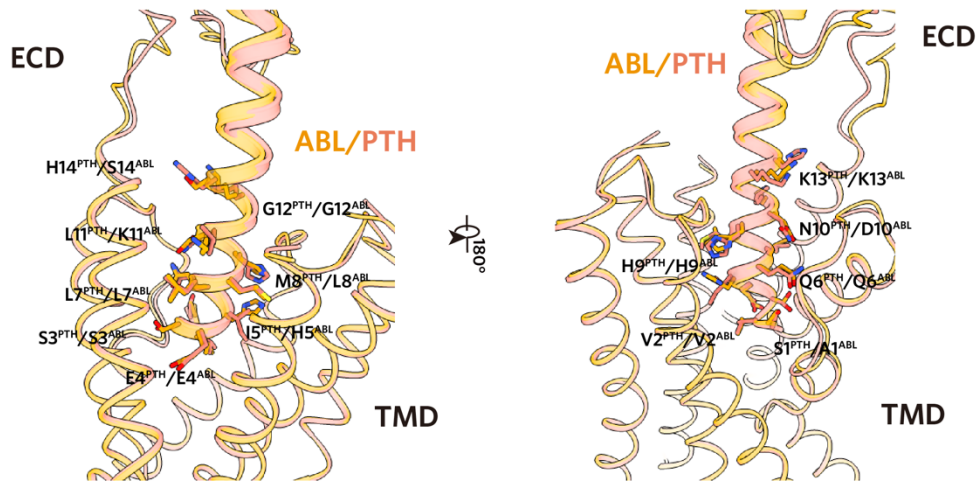

**b**

|        | TM1 |     |     |     |     |     |     |     | TM2 |     |     |     | TM3 |     |     |     |     |
|--------|-----|-----|-----|-----|-----|-----|-----|-----|-----|-----|-----|-----|-----|-----|-----|-----|-----|
|        | 174 | 178 | 180 | 181 | 184 | 187 | 191 | 195 | 233 | 237 | 244 | 245 | 285 | 288 | 289 | 292 | 296 |
| PTH    | L   | T   | E   | R   | F   | L   | Y   | Y   | R   | I   |     | Y   | F   | L   | L   | Y   |     |
| ABL    |     |     |     | F   | L   |     |     |     | R   |     |     | Y   | F   | L   | L   | Y   |     |
| LA-PTH |     |     |     | R   | F   | L   |     | Y   | R   | I   | L   |     | V   | F   |     | L   | Y   |

  

|        | ECL2 |     |     | TM5 |     |     |     | TM6 |     |     | ECL3 |     |     |     | TM7 |     |     |     |     |     |     |     |
|--------|------|-----|-----|-----|-----|-----|-----|-----|-----|-----|------|-----|-----|-----|-----|-----|-----|-----|-----|-----|-----|-----|
|        | 353  | 354 | 355 | 360 | 363 | 364 | 367 | 368 | 424 | 425 | 427  | 428 | 429 | 430 | 432 | 436 | 437 | 440 | 441 | 444 | 445 | 448 |
| PTH    | D    | L   | D   |     |     | Q   | I   | L   | F   | M   | T    | P   | Y   | T   | V   | W   | Q   | M   | E   | M   | N   |     |
| ABL    | D    | L   | D   | K   |     | Q   | I   | L   |     | M   | T    |     | Y   | T   |     | W   | Q   | M   | E   | M   | N   |     |
| LA-PTH | D    | L   | D   |     | I   | Q   | I   | L   |     | M   | T    | Y   |     | V   |     | L   | W   | Q   | M   | E   | M   |     |

### Supplementary Fig.6 Molecular recognition of peptide agonists by PTH1R.

**a**, The N-terminal portions of PTH and ABL show similar binding mode within the TM core of PTH1R. **b**, Detail interactions of PTH1R with the N-terminal portions of three peptide agonists (PTH, ABL and LA-PTH). Interactions between LA-PTH and PTH1R were analyzed by our previously reported structure (PDB 6NBF). Mutagenesis studies for the residues of the receptor that make differential contacts with the three peptides using cAMP signaling assays.

## Supplementary Fig.7

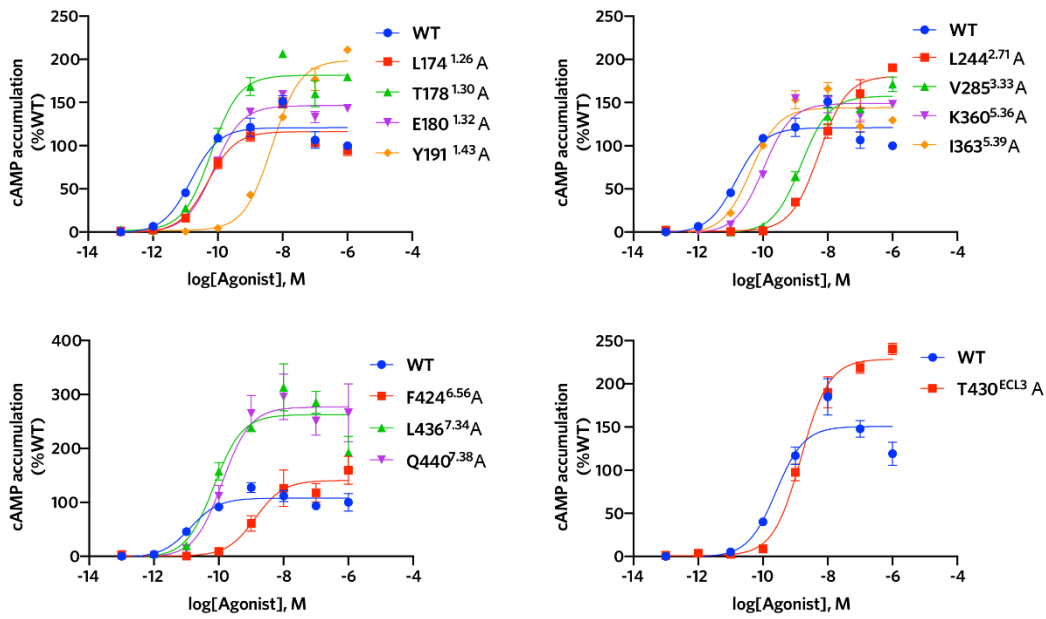

## Supplementary Fig.7 ABL-induced cAMP accumulation of wild-type and mutant PTH1R.

Dose-response curves of cAMP accumulation measured by Glosensor assay. The data were analyzed using the 'log(agonist) vs. response-Variable slope (four parameters)' function in Graphpad Prism. All data are presented as mean values  $\pm$  standard error of measurement (SEM) from three independent experiments performed in triplicate. Source data are provided as a Source Data file.

## Supplementary Fig.8

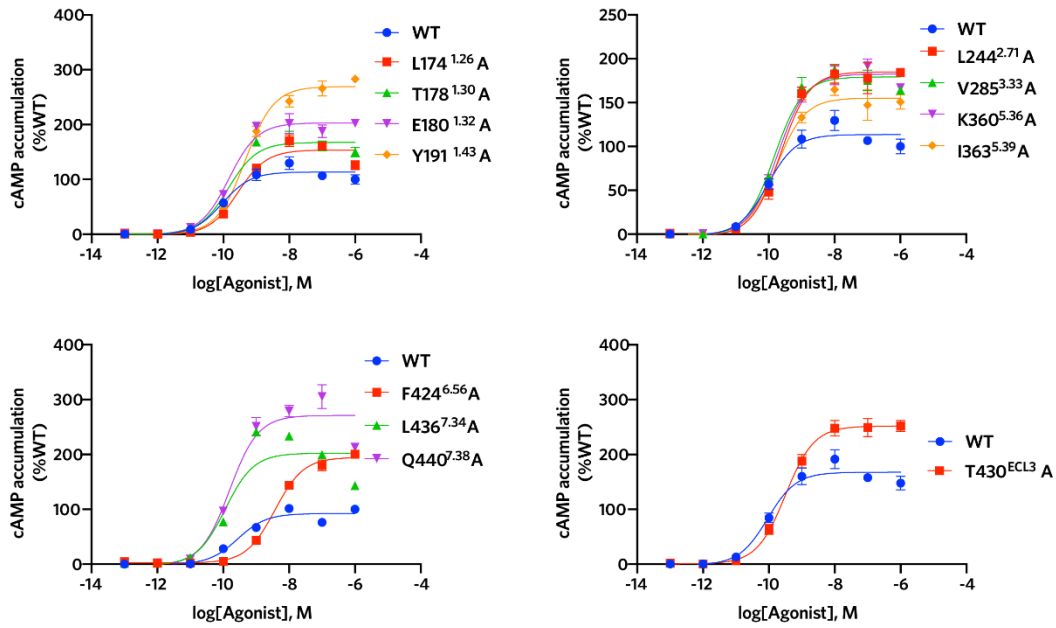

## Supplementary Fig.8 PTH-induced cAMP accumulation of wild-type and mutant PTH1R.

Dose-response curves of cAMP accumulation measured by Glosensor assay. The data were analyzed using the 'log(agonist) vs. response-Variable slope (four parameters)' function in Graphpad Prism. All data are presented as mean values ± standard error of measurement (SEM) from three independent experiments performed in triplicate. Source data are provided as a Source Data file.

## Supplementary Fig.9

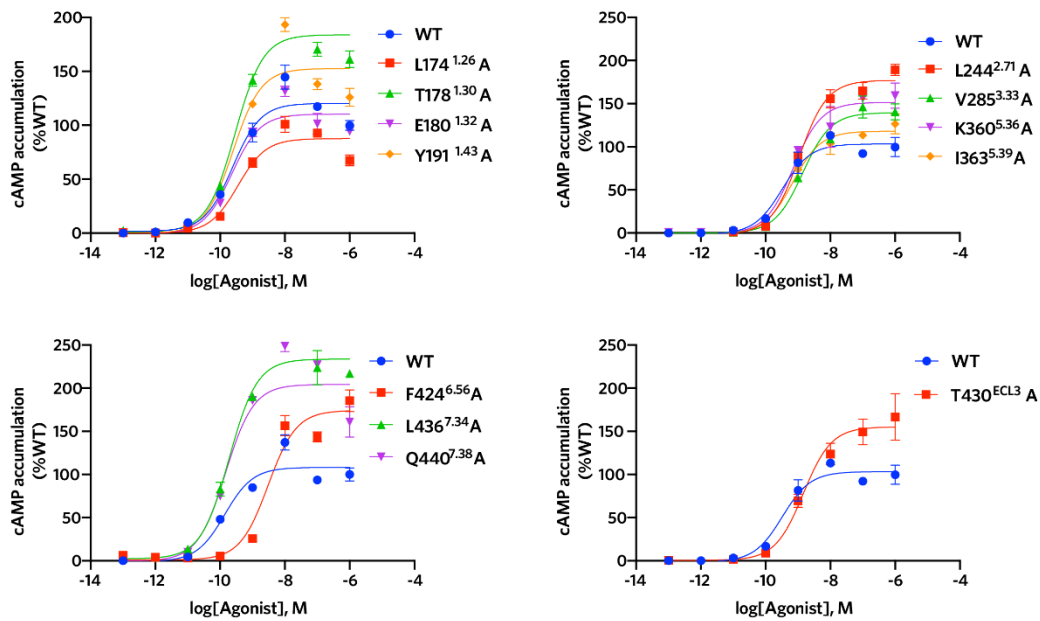

### Supplementary Fig.9 LA-PTH-induced cAMP accumulation of wild-type and mutant PTH1R.

Dose-response curves of cAMP accumulation measured by Glosensor assay. The data were analyzed using the 'log(agonist) vs. response-Variable slope (four parameters)' function in Graphpad Prism. All data are presented as mean values  $\pm$  standard error of measurement (SEM) from three independent experiments performed in triplicate. Source data are provided as a Source Data file.

## Supplementary Fig.10

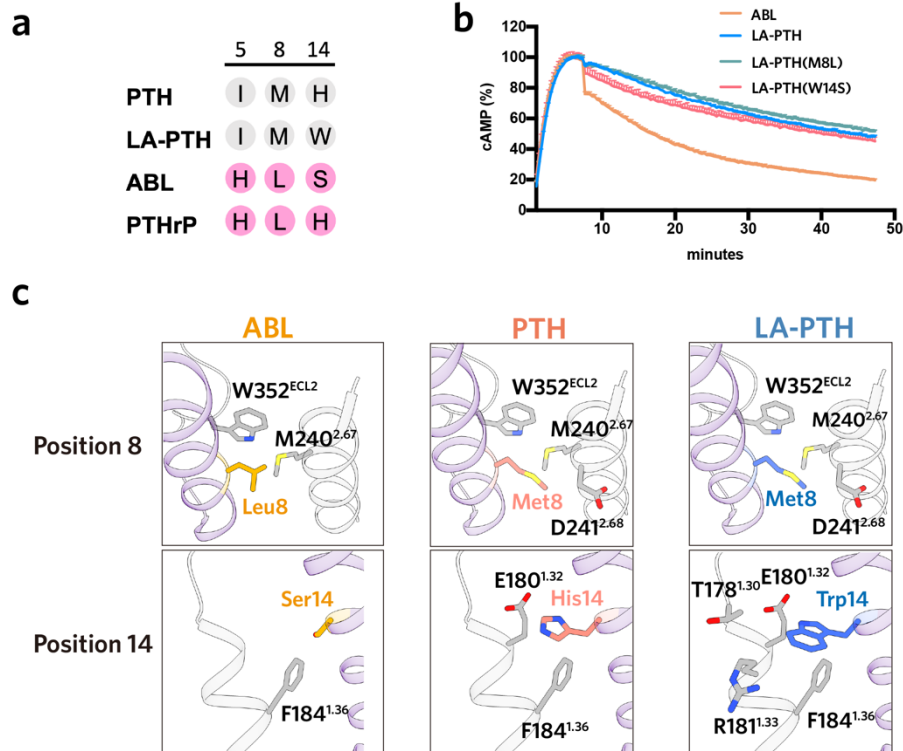

### Supplementary Fig.10 Role of the N-terminal residues of LA-PTH in the prolonged cAMP signaling.

**a**, Sequence alignment of the residues 5, 8 and 14 in the N-terminal portion of peptide agonists. **b**, Effects of mutations in residues 8 and 14 of LA-PTH on its induced prolonged cAMP signaling. **c**, The potential interactions of residues in position 8 and 14 of peptide agonists with the  $R_0$  state receptor (PDB 6FJ3). The potential interactions were analyzed based on the template of ePTH-bound PTH1R. Source data are provided as a Source Data file.

**Supplementary Fig.11**

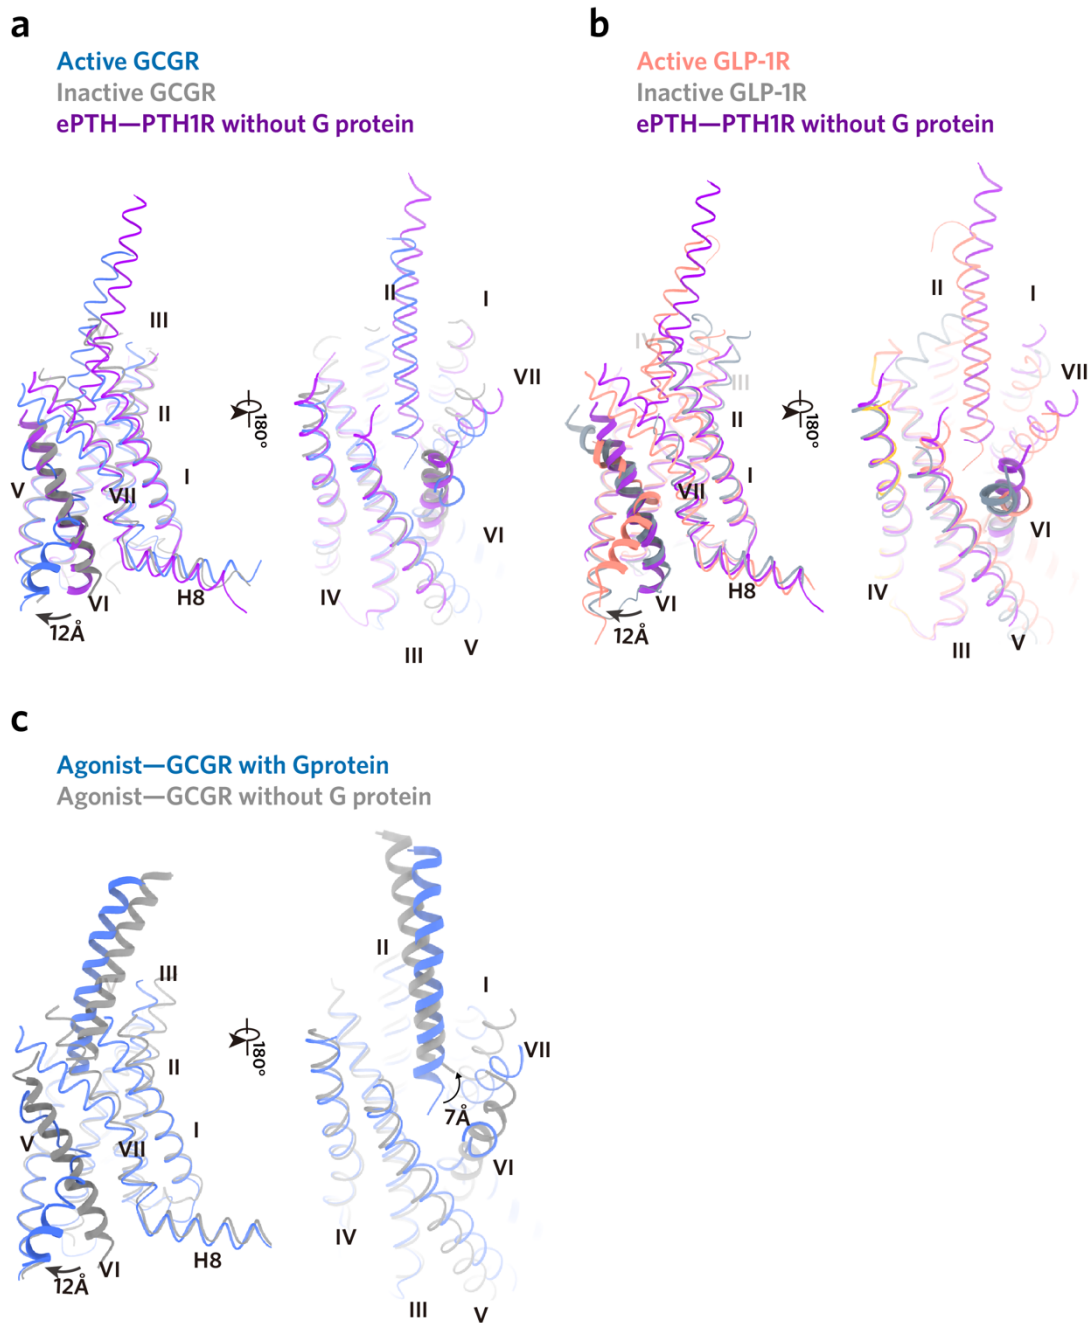

**Supplementary Fig.11 The ePTH-bound PTH1R is probably a representative “intermediate state” in class B1 GPCRs.**

**a**, Structural comparison of the ePTH–PTH1R (PDB 6FJ3) with active (PDB 6LMK) and inactive GCGR (PDB 5XEZ). **b**, Structural comparison of the ePTH–PTH1R (PDB 6FJ3) with active (PDB 6VCB) and inactive GLP-1R (PDB 6LN2). **c**, Structural comparison of the peptide–bound GCGR with (PDB 6LMK) and without G-protein (PDB 5YQZ).

## Supplementary Fig.12

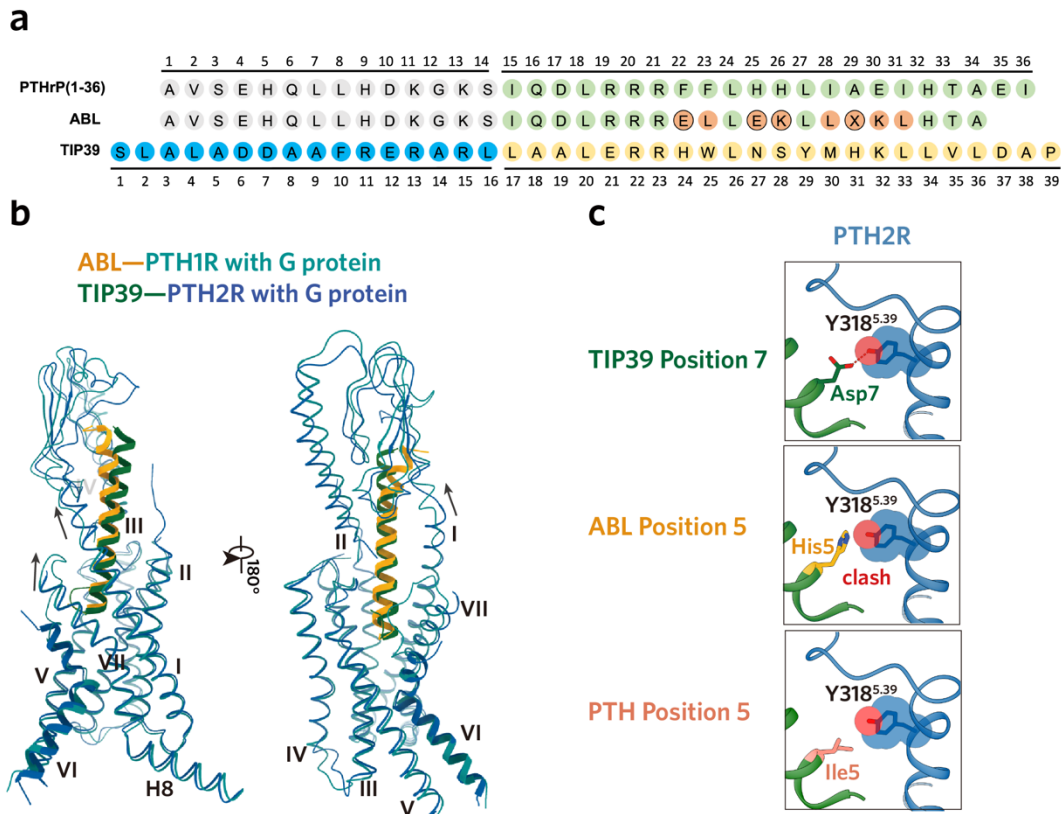

### Supplementary Fig.12 Role of the divergent residue 5 between PTH and PTHrP in the recognition of PTH1R and PTH2R.

**a**, Sequence alignment of the PTHrP, ABL and TIP39. **b**, Structural comparisons of the ABL-bound PTH1R with TIP39-bound PTH2R (PDB 7F16). **c**, The divergent residue 5 between PTH and PTHrP makes differential interactions with PTH2R, which may explain the weak actions between PTHrP and PTH2R.

## Supplementary Fig.13

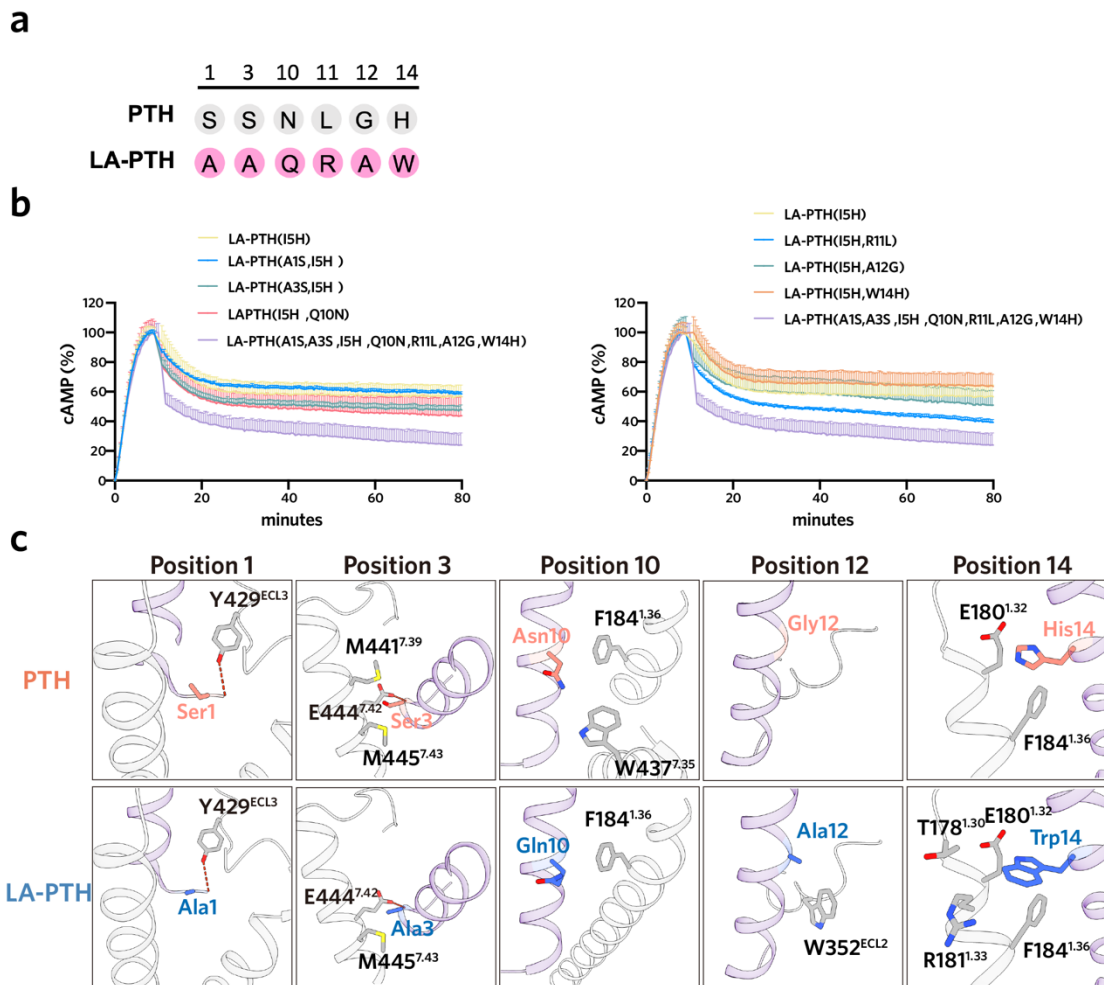

### Supplementary Fig.13 Role of “M” substitutions in LA-PTH–induced prolonged cAMP signaling.

**a**, Sequence alignment of the divergences in the N-terminal portion of LA-PTH and PTH. “M” substitutions in LA-PTH are colored pink. **b**, Effects of mutations in the “M” substitutions of LA-PTH on its induced prolonged cAMP signaling. **c**, The potential interactions of the “M” substitutions in LA-PTH with the R<sub>0</sub> state receptor (PDB 6FJ3). The potential interactions were analyzed based on the template of ePTH-bound PTH1R. Source data are provided as a Source Data file.



## Supplementary Fig.14

**a**

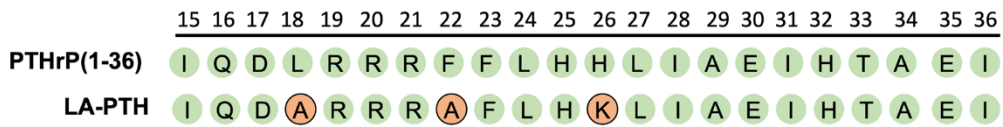

**b**

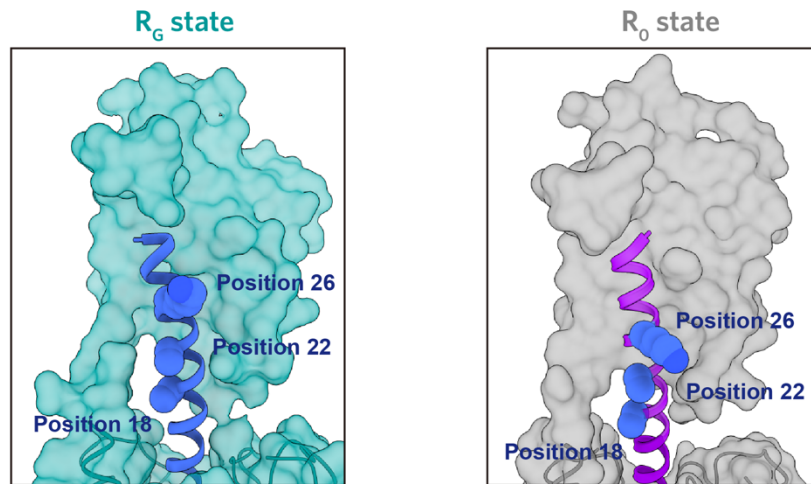

### Supplementary Fig.14 Sequence and structural analysis of the three residue substitutions in the C-terminal portion of LA-PTH.

**a**, Sequence alignment between the C-terminal portion of LA-PTH and PTHrP. The residue discrepancies in the C-terminal portion of the two peptides are colored orange.

**b**, The three residues (position 18, 22 and 26) in the C-terminal portion of peptide are located at the solvent-accessible side of the peptide agonists for both  $R_G$  (PDB 6NBF) and  $R_0$  states (PDB 6FJ3) of PTH1R.

**Supplementary Table.1 Cryo-EM data collection, refinement and validation statistics**

|                                                     | PTH-PTH1R-<br>DNG $\alpha$ s<br>(EMDB-33590)<br>(PDB-7Y36) | ABL-PTH1R-<br>DNG $\alpha$ s<br>(EMDB-33588)<br>(PDB-7Y35) |
|-----------------------------------------------------|------------------------------------------------------------|------------------------------------------------------------|
| <b>Data collection and processing</b>               |                                                            |                                                            |
| Magnification                                       | 4,9310                                                     | 4,9310                                                     |
| Voltage (kV)                                        | 300                                                        | 300                                                        |
| Electron exposure (e <sup>-</sup> /Å <sup>2</sup> ) | 64                                                         | 64                                                         |
| Defocus range (μm)                                  | -0.5 ~ -2.5                                                | -0.5 ~ -2.5                                                |
| Pixel size (Å)                                      | 1.014                                                      | 1.014                                                      |
| Symmetry imposed                                    | C1                                                         | C1                                                         |
| Initial particle projections                        | 3,607,078                                                  | 2,036,564                                                  |
| Final particle projections                          | on TMG:208,642<br>on ECD:114,276                           | on TMG: 92,627<br>on ECD:135,880                           |
| Map resolution (Å)                                  | 2.8                                                        | 2.9                                                        |
| FSC threshold                                       | 0.143                                                      | 0.143                                                      |
| Map resolution range (Å)                            | 2.5-5.0                                                    | 2.5-5.0                                                    |
| <b>Refinement</b>                                   |                                                            |                                                            |
| Initial model used                                  | 6NBF                                                       | 6NBF                                                       |
| Model resolution (Å)                                | 3.2                                                        | 3.1                                                        |
| FSC threshold                                       | 0.5                                                        | 0.5                                                        |
| Map sharpening method                               | DeepEMhancer                                               | DeepEMhancer                                               |
| Model composition                                   |                                                            |                                                            |
| Non-hydrogen atoms                                  | 9218                                                       | 9203                                                       |
| Protein residues                                    | 1153                                                       | 1152                                                       |
| Ligand                                              | 1                                                          | 1                                                          |
| <i>B</i> factors (Å <sup>2</sup> )                  |                                                            |                                                            |
| Protein                                             | 99.58                                                      | 94.67                                                      |
| Ligand                                              | 110.91                                                     | 95.45                                                      |
| R.m.s. deviations                                   |                                                            |                                                            |
| Bond lengths (Å)                                    | 0.007                                                      | 0.010                                                      |
| Bond angles (°)                                     | 0.732                                                      | 0.800                                                      |
| Validation                                          |                                                            |                                                            |
| MolProbity score                                    | 1.68                                                       | 1.54                                                       |
| Clashscore                                          | 7.11                                                       | 5.09                                                       |
| Rotamer outliers (%)                                | 0.00                                                       | 0.00                                                       |
| Ramachandran plot                                   |                                                            |                                                            |
| Favored (%)                                         | 95.84                                                      | 96.01                                                      |
| Allowed (%)                                         | 4.16                                                       | 3.99                                                       |
| Disallowed (%)                                      | 0                                                          | 0                                                          |

## Supplementary Table.2 Interactions of PTH with PTH1R.

Residues within 4 Å are shown.

| PTH   | PTH1R                  | Interaction               |
|-------|------------------------|---------------------------|
| Ser1  | Phe424 <sup>6.56</sup> | Hydrogen bond             |
|       | Met425 <sup>6.57</sup> |                           |
|       | Thr427 <sup>6.59</sup> |                           |
|       | Pro428 <sup>ECL3</sup> | Polar interaction         |
|       | Tyr429 <sup>ECL3</sup> | Van der waals force       |
| Val2  | Tyr296 <sup>3.44</sup> | Van der waals force       |
|       | Gln364 <sup>5.40</sup> | Polar interaction         |
|       | Ile367 <sup>5.43</sup> | Hydrophobic interaction   |
| Ser3  | Gln440 <sup>7.38</sup> | Polar interaction         |
|       | Glu444 <sup>7.42</sup> |                           |
|       | Met441 <sup>7.39</sup> | Van der waals force       |
|       | Met445 <sup>7.43</sup> |                           |
| Glu4  | Arg233 <sup>2.60</sup> | Electrostatic interaction |
|       | Ile237 <sup>2.64</sup> | Van der waals force       |
|       | Phe288 <sup>3.36</sup> |                           |
|       | Tyr195 <sup>1.47</sup> | Hydrogen bond             |
|       | Asn448 <sup>7.46</sup> | Hydrogen bond             |
| Ile5  | Leu289 <sup>3.37</sup> | Hydrophobic interaction   |
|       | Leu292 <sup>3.40</sup> |                           |
|       | Gln364 <sup>5.40</sup> | Van der waals force       |
| Gln6  | Thr430 <sup>ECL3</sup> | Polar interaction         |
|       | Trp437 <sup>7.35</sup> | Van der waals force       |
|       | Gln440 <sup>7.38</sup> | Hydrogen bond             |
|       | Met441 <sup>7.38</sup> | Hydrophobic interaction   |
|       | Tyr429 <sup>ECL3</sup> |                           |
| Leu7  | Leu187 <sup>1.39</sup> | Hydrophobic interaction   |
|       | Met441 <sup>7.38</sup> | Van der waals force       |
|       | Met445 <sup>7.43</sup> |                           |
| Met8  | Tyr245 <sup>2.72</sup> | Van der waals force       |
|       | Asp353 <sup>ECL2</sup> |                           |
| His9  | Asp353 <sup>ECL2</sup> | Electrostatic interaction |
|       | Tyr429 <sup>ECL3</sup> | Van der waals force       |
|       | Ser354 <sup>ECL2</sup> |                           |
|       | Ser355 <sup>ECL2</sup> |                           |
| Asn10 | Val432 <sup>ECL2</sup> | Van der waals force       |
|       | Trp437 <sup>7.35</sup> |                           |
|       | Phe184 <sup>1.63</sup> |                           |

|       |                                                              |                           |
|-------|--------------------------------------------------------------|---------------------------|
| Leu11 | <u>Phe184<sup>1.63</sup></u><br><u>Tyr245<sup>2.72</sup></u> | Hydrophobic interaction   |
| Gly12 | Leu354 <sup>ECL3</sup>                                       | Hydrophobic interaction   |
| Lys13 | Leu354 <sup>ECL3</sup>                                       | Van der waals force       |
| His14 | Glu180 <sup>1.32</sup>                                       | Electrostatic interaction |
|       | <u>Arg181<sup>1.33</sup></u>                                 | Van der waals force       |
|       | <u>Phe184<sup>1.36</sup></u>                                 |                           |

**Supplementary Table.3 Interactions of ABL with PTH1R.**

Residues within 4 Å are shown.

| <b>ABL</b> | <b>PTH1R</b>           | <b>Interaction</b>      |
|------------|------------------------|-------------------------|
| Ala1       | Leu368 <sup>5.44</sup> | Hydrophobic interaction |
|            | Met425 <sup>6.57</sup> | Hydrogen bond           |
|            | Thr427 <sup>6.59</sup> | Polar interaction       |
|            | Tyr429 <sup>ECL3</sup> | Van der waals force     |
| Val2       | Tyr296 <sup>3.44</sup> | Van der waals force     |
|            | Gln364 <sup>5.40</sup> | Polar interaction       |
|            | Ile367 <sup>5.43</sup> | Hydrophobic interaction |
| Ser3       | Met441 <sup>7.39</sup> | Polar interaction       |
|            | Glu444 <sup>7.42</sup> |                         |
|            | Met445 <sup>7.43</sup> | Van der waals force     |
| Glu4       | Arg233 <sup>2.60</sup> | Salt bridge             |
|            | Tyr296 <sup>3.44</sup> | Polar interaction       |
|            | Met445 <sup>7.43</sup> | Hydrophobic interaction |
|            | Asn448 <sup>7.46</sup> | Hydrogen bond           |
| His5       | Leu289 <sup>3.37</sup> | Van der waals force     |
|            | Lys360 <sup>5.36</sup> |                         |
|            | Gln364 <sup>5.40</sup> | Hydrogen bond           |
|            | Tyr429 <sup>ECL3</sup> | Polar interaction       |
| Gln6       | Tyr429 <sup>ECL3</sup> | Van der waals force     |
|            | Thr430 <sup>ECL3</sup> | Polar interaction       |
|            | Trp437 <sup>7.35</sup> | Van der waals force     |
|            | Gln440 <sup>7.38</sup> | Polar interaction       |
|            | Met441 <sup>7.39</sup> | Hydrophobic interaction |
| Leu7       | Phe184 <sup>1.36</sup> | Hydrophobic interaction |
|            | Leu187 <sup>1.39</sup> |                         |
|            | Trp437 <sup>7.35</sup> | Van der waals force     |
|            | Met445 <sup>7.43</sup> | Hydrophobic interaction |
| Leu8       | Tyr245 <sup>2.72</sup> | Polar interaction       |
| His9       | Asp353 <sup>ECL2</sup> | Polar interaction       |
|            | Ser355 <sup>ECL2</sup> |                         |
|            | Tyr429 <sup>ECL3</sup> |                         |

|       |                        |                         |
|-------|------------------------|-------------------------|
| Asp10 | Phe184 <sup>1.63</sup> | Van der waals force     |
|       | Tyr437 <sup>7.35</sup> | Polar interaction       |
|       | Met441 <sup>7.39</sup> | Van der waals force     |
| Lys11 | Phe184 <sup>1.36</sup> | Van der waals force     |
|       | Tyr245 <sup>2.72</sup> |                         |
| Lys13 | Leu354 <sup>ECL2</sup> | Hydrophobic interaction |

**Supplementary Table.4 PTH-induced cAMP accumulation of wild-type and mutant PTH1R.**

|                        | $\Delta pEC_{50} \pm SEM^{a,b}$ | Span $\pm SEM^{a,b}$ | Sample size | Expression (%WT)  |
|------------------------|---------------------------------|----------------------|-------------|-------------------|
| WT                     | 0                               | 125.53 $\pm$ 6.27    | 3           | 100               |
| L174 <sup>1.26</sup> A | -0.53 $\pm$ 0.09****            | 116.27 $\pm$ 19.65   | 3           | 135.1 $\pm$ 12.67 |
| T178 <sup>1.30</sup> A | -0.21 $\pm$ 0.05 <sup>ns</sup>  | 147.23 $\pm$ 17.05   | 3           | 70.43 $\pm$ 3.37  |
| E180 <sup>1.32</sup> A | -0.11 $\pm$ 0.07 <sup>ns</sup>  | 193.57 $\pm$ 39.96   | 3           | 99.65 $\pm$ 4.01  |
| Y191 <sup>1.43</sup> A | -0.84 $\pm$ 0.08****            | 164.77 $\pm$ 14.05   | 3           | 124.6 $\pm$ 9.82  |
| L244 <sup>2.71</sup> A | -0.48 $\pm$ 0.05****            | 150.17 $\pm$ 18.04   | 3           | 99.96 $\pm$ 6.93  |
| V285 <sup>3.33</sup> A | -0.15 $\pm$ 0.04 <sup>ns</sup>  | 152.43 $\pm$ 15.43   | 3           | 102.6 $\pm$ 7.87  |
| K360 <sup>5.36</sup> A | -0.14 $\pm$ 0.10 <sup>ns</sup>  | 135.06 $\pm$ 20.89   | 3           | 133.7 $\pm$ 9.52  |
| I363 <sup>5.39</sup> A | -0.28 $\pm$ 0.04*               | 180.23 $\pm$ 7.67    | 3           | 69.63 $\pm$ 2.06  |
| F424 <sup>6.56</sup> A | -1.43 $\pm$ 0.05****            | 143.97 $\pm$ 16.16   | 3           | 111.1 $\pm$ 24.91 |
| T430 <sup>ECL3</sup> A | -0.32 $\pm$ 0.03**              | 174.77 $\pm$ 10.12   | 3           | 98.22 $\pm$ 20.13 |
| L436 <sup>7.34</sup> A | 0.06 $\pm$ 0.04 <sup>ns</sup>   | 220.70 $\pm$ 25.60   | 3           | 104.2 $\pm$ 28.38 |
| Q440 <sup>7.38</sup> A | -0.16 $\pm$ 0.03 <sup>ns</sup>  | 297.80 $\pm$ 37.90   | 3           | 145.5 $\pm$ 30.32 |

<sup>a</sup>Data shown are means  $\pm$  SEM from at least three independent experiments performed in technical triplicate. <sup>ns</sup> $P > 0.01$ , \* $P < 0.05$ , \*\* $P < 0.01$ , \*\*\* $P < 0.001$  and \*\*\*\* $P < 0.0001$  by one-way ANOVA followed by Dunnett's post-test, compared with the response of the WT. <sup>b</sup>The span is defined as the window between the maximal response (E<sub>max</sub>) and the vehicle (no PTH). Source data are provided as a Source Data file.

**Supplementary Table.5 ABL-induced cAMP accumulation of wild-type and mutant PTH1R.**

|                        | $\Delta pEC_{50} \pm SEM^{a,b}$ | Span $\pm SEM^{a,b}$ | Sample size | Expression (% WT) |
|------------------------|---------------------------------|----------------------|-------------|-------------------|
| WT                     | 0                               | 121.80 $\pm$ 3.30    | 3           | 100               |
| L174 <sup>1.26</sup> A | -0.52 $\pm$ 0.09****            | 113.79 $\pm$ 10.36   | 3           | 135.1 $\pm$ 12.67 |
| T178 <sup>1.30</sup> A | -0.73 $\pm$ 0.06****            | 132.49 $\pm$ 24.86   | 3           | 70.43 $\pm$ 3.37  |
| E180 <sup>1.32</sup> A | -0.55 $\pm$ 0.03****            | 134.23 $\pm$ 13.07   | 3           | 99.65 $\pm$ 4.01  |
| Y191 <sup>1.43</sup> A | -2.49 $\pm$ 0.07****            | 230.23 $\pm$ 16.63   | 3           | 124.6 $\pm$ 9.82  |
| L244 <sup>2.71</sup> A | -2.54 $\pm$ 0.04****            | 224.50 $\pm$ 22.26   | 3           | 99.96 $\pm$ 6.93  |
| V285 <sup>3.33</sup> A | -2.06 $\pm$ 0.1****             | 173.37 $\pm$ 7.80    | 3           | 102.6 $\pm$ 7.87  |
| K360 <sup>5.36</sup> A | -1.13 $\pm$ 0.05****            | 130.30 $\pm$ 10.66   | 3           | 133.7 $\pm$ 9.52  |
| I363 <sup>5.39</sup> A | -0.57 $\pm$ 0.08****            | 151.93 $\pm$ 9.20    | 3           | 69.63 $\pm$ 2.06  |
| F424 <sup>6.56</sup> A | -2.01 $\pm$ 0.04****            | 153.20 $\pm$ 9.11    | 3           | 111.1 $\pm$ 24.91 |
| T430 <sup>ECL3</sup> A | -0.8 $\pm$ 0.03****             | 204.13 $\pm$ 13.19   | 3           | 98.22 $\pm$ 20.13 |
| L436 <sup>7.34</sup> A | -0.63 $\pm$ 0.09****            | 225.53 $\pm$ 30.07   | 3           | 104.2 $\pm$ 28.38 |
| Q440 <sup>7.38</sup> A | -1.05 $\pm$ 0.04****            | 289.77 $\pm$ 25.27   | 3           | 145.5 $\pm$ 30.32 |

<sup>a</sup>Data shown are means  $\pm$  SEM from at least three independent experiments performed in technical triplicate. <sup>ns</sup> $P > 0.01$ , \* $P < 0.05$ , \*\* $P < 0.01$ , \*\*\* $P < 0.001$  and \*\*\*\* $P < 0.0001$  by one-way ANOVA followed by Dunnett's post-test, compared with the response of the WT. <sup>b</sup>The span is defined as the window between the maximal response (Emax) and the vehicle (no ABL). Source data are provided as a Source Data file.



**Supplementary Table.6 LA-PTH-induced cAMP accumulation of wild-type and mutant PTH1R.**

|                        | $\Delta pEC_{50} \pm SEM^{a,b}$  | Span $\pm SEM^{a,b}$ | Sample size | Expression (%WT)  |
|------------------------|----------------------------------|----------------------|-------------|-------------------|
| WT                     | 0                                | 114.00 $\pm$ 3.67    | 3           | 100               |
| L174 <sup>1.26</sup> A | -0.20 $\pm$ 0.03 <sup>ns</sup>   | 93.27 $\pm$ 3.07     | 3           | 135.1 $\pm$ 12.67 |
| T178 <sup>1.30</sup> A | -0.05 $\pm$ 0.02 <sup>ns</sup>   | 133.60 $\pm$ 23.62   | 3           | 70.43 $\pm$ 3.37  |
| E180 <sup>1.32</sup> A | 0.03 $\pm$ 0.04 <sup>ns</sup>    | 158.60 $\pm$ 26.43   | 3           | 99.65 $\pm$ 4.01  |
| Y191 <sup>1.43</sup> A | -0.09 $\pm$ 0.04 <sup>ns</sup>   | 148.60 $\pm$ 7.84    | 3           | 124.6 $\pm$ 9.82  |
| L244 <sup>2.71</sup> A | -0.39 $\pm$ 0.02 <sup>***</sup>  | 167.07 $\pm$ 18.33   | 3           | 99.96 $\pm$ 6.93  |
| V285 <sup>3.33</sup> A | -0.42 $\pm$ 0.05 <sup>***</sup>  | 170.70 $\pm$ 21.34   | 3           | 102.6 $\pm$ 7.87  |
| K360 <sup>5.36</sup> A | -0.08 $\pm$ 0.09 <sup>ns</sup>   | 133.83 $\pm$ 9.72    | 3           | 133.7 $\pm$ 9.52  |
| I363 <sup>5.39</sup> A | -0.05 $\pm$ 0.19 <sup>ns</sup>   | 118.06 $\pm$ 12.99   | 3           | 69.63 $\pm$ 2.06  |
| F424 <sup>6.56</sup> A | -1.16 $\pm$ 0.1 <sup>****</sup>  | 143.97 $\pm$ 16.16   | 3           | 111.1 $\pm$ 24.91 |
| T430 <sup>ECL3</sup> A | -1.10 $\pm$ 0.03 <sup>****</sup> | 174.33 $\pm$ 11.17   | 3           | 98.22 $\pm$ 20.13 |
| L436 <sup>7.34</sup> A | 0.01 $\pm$ 0.07 <sup>ns</sup>    | 201.20 $\pm$ 19.49   | 3           | 104.2 $\pm$ 28.38 |
| Q440 <sup>7.38</sup> A | -0.01 $\pm$ 0.02 <sup>ns</sup>   | 289.33 $\pm$ 25.51   | 3           | 145.5 $\pm$ 30.32 |

<sup>a</sup>Data shown are means  $\pm$  SEM from at least three independent experiments performed in technical triplicate. <sup>ns</sup> $P > 0.01$ ,  $*P < 0.05$ ,  $**P < 0.01$ ,  $***P < 0.001$  and  $****P < 0.0001$  by one-way ANOVA followed by Dunnett's post-test, compared with the response of the WT. <sup>b</sup>The span is defined as the window between the maximal response (Emax) and the vehicle (no LA-PTH). Source data are provided as a Source Data file.

**Supplementary Table 7. List of primer sequences used in this study**

| Oligonucleotide name | Oligonucleotide sequence (5'→3')              | Cloning                   | Product                   |
|----------------------|-----------------------------------------------|---------------------------|---------------------------|
| PTH1R-FL F           | tcttctgctggattteccGATGCAGATGACGTCATGACTAAAG   | Homologous recombination  | pfastbac-PTH1R-FL-LgBiT   |
| PTH1R-FL R           | tcgagtgfgaagacgaatteCATCACGGTTTCCCCTCTTCT     |                           |                           |
| Linear pfastbac F    | GAATTCGCTTTCACACTCGAAGATT                     |                           |                           |
| Linear pfastbac R    | GGCGAATACCAGGCAGAAGATGTA                      |                           |                           |
| PTH1R-FL F           | ACAAGGACGATGATGACAAGGATGCAGATGACGTCATGACTAAAG | Homologous recombination  | pcDNA 3.0-PTH1R-FL        |
| PTH1R-FL-R           | tttaaacgggcccctactaCATCACGGTTTCCCCTCTTCT      |                           |                           |
| Linear pcDNA F       | TAGTAGAGGGCCCGTTTAAACCC                       |                           |                           |
| Linear pcDNA R       | CTTGTCATCATCGTCCTTGTAGTCG                     |                           |                           |
| PTH1R-FL F           | aagtcctttccaggcccctGATGCAGATGACGTCATGACTAAAG  | Homologous recombination  | pcDNA 3.0-PTH1R-FL-LgBiT  |
| PTH1R-FL-LgBiT R     | aaatcttcgagtgfgaagacCATCACGGTTTCCCCTCTTCT     |                           |                           |
| Linear pcDNA F       | GTCTTCACACTCGAAGATTTCGTTG                     |                           |                           |
| Linear pcDNA R       | AGGGCCCTGGAAGGACT                             |                           |                           |
| L174A F              | TgcaACCAATGAGACTCGTGAACGGGAGGTGT              | Site-directed mutagenesis | pcDNA 3.0-PTH1R-FL(L174A) |
| L174A R              | GAGTCTCATTGGTgcaAAATTTGACACACTCGCTGTAGTTG     |                           |                           |
| T178A F              | CAATGAGgcaCGTGAACGGGAGGTGTTGACC               |                           | pcDNA 3.0-PTH1R-FL(T178A) |
| T178A R              | GTTCACGtgcCTCATTGGTGAGAAATTTGACACAC           |                           |                           |
| E180A F              | AATGAGACTCGTgcaCGGGAGGTGTTTGACCGC             |                           | pcDNA 3.0-PTH1R-FL(E180A) |
| E180A R              | CGtgcACGAGTCTCATTGGTGAGAAATTTGAC              |                           |                           |
| Y191A F              | CATGATTgcaACCGTGGGCTACTCCGTGTC                |                           | pcDNA 3.0-PTH1R-FL(Y191A) |
| Y191A R              | CCACGGTgcaAATCATGGCCAGGCGGTCAAAC              |                           |                           |
| L244A F              | ACGCTGTGgcaTACTCTGGGCCACGCTTGAT               |                           | pcDNA 3.0-PTH1R-FL(L244A) |
| L244A R              | AGAGTAtgcCACAGCGTCCTTGACGAAGATGC              |                           |                           |
| V285A F              | GTGGCTgcaACCTTCTCCTTTACTTCTGGC                |                           | pcDNA 3.0-PTH1R-FL(V285A) |
| V285A R              | AAGAAGGTgcaAGCCACCCTGCAGCCCGGTA               |                           |                           |
| K360A F              | GGAACAAAgcaTGGATCATCCAGGTGCCATC               |                           | pcDNA 3.0-PTH1R-FL(K360A) |
| K360A R              | GATCCAtgcTTTGTTCCTGGAGCTCAAGTCCC              |                           |                           |
| I363A F              | AAGTGGATCgcaCAGGTGCCATCCTGGCCTC               |                           | pcDNA 3.0-PTH1R-FL(I363A) |
| I363A R              | ACCTGtgcGATCCACTTTTTGTCCCGGAGCT               |                           |                           |
| F424A F              | ACATTGTCgcaGCCACACCACACCGAGGTC                |                           | pcDNA 3.0-PTH1R-FL(F424A) |
| F424A R              | TGTGGCTgcaGACAATGTAGTGGACGCCAAAGA             |                           |                           |
| T430A F              | ACCATACgcaGAGGTCTCAGGGACGCTCTGGC              |                           | pcDNA 3.0-PTH1R-FL(T430A) |
| T430A R              | AGACCTCtgcGTATGGTGTGCCATGAAGACA               |                           |                           |
| L436A F              | gcaTGGCAAGTCCAGATGCACTATGAGATGCT              | pcDNA 3.0-PTH1R-FL(L436A) |                           |
| L436A R              | ATCTGGACTTGCCAtgcCGTCCCTGAGACCTCGGTG          |                           |                           |
| Q440A F              | GCAAGTCgcaATGCACTATGAGATGCTCTTCAACTC          | pcDNA 3.0-PTH1R-FL(Q440A) |                           |
| Q440A R              | AGTGCATtgcGACTTGCCAGAGCGTCCCTGAG              |                           |                           |
