# Supplementary material for: Molecular insights into the distinct signaling duration for the peptide-induced PTH1R activation
Source: PubMed Central journal article supplement (PMC9586930; doi:10.1038/s41467-022-34009-x), 2022-10-21
Supplement: 41467_2022_34009_MOESM3_ESM.pdf [file 41467_2022_34009_MOESM3_ESM.pdf]

### **Description of Additional Supplementary Files**

File Name: Supplementary Movie 1

Description: 3D variability analysis of ABL-bound PTH1R-Gs complex, related to Figures 2.

File Name: Supplementary Movie 2

Description: 3D variability analysis of PTH-bound PTH1R-Gs complex, related to Figures 2.

File Name: Supplementary Movie 3

Description: 3D variability analysis of LA-PTH-bound PTH1R-Gs complex, related to Figures 2.
